# Supplementary material
Source: PubMed Central journal article supplement (PMC3813878)
Supplement: supp_113.154740_FigureS3.pdf [file supp_113.154740_FigureS3.pdf]

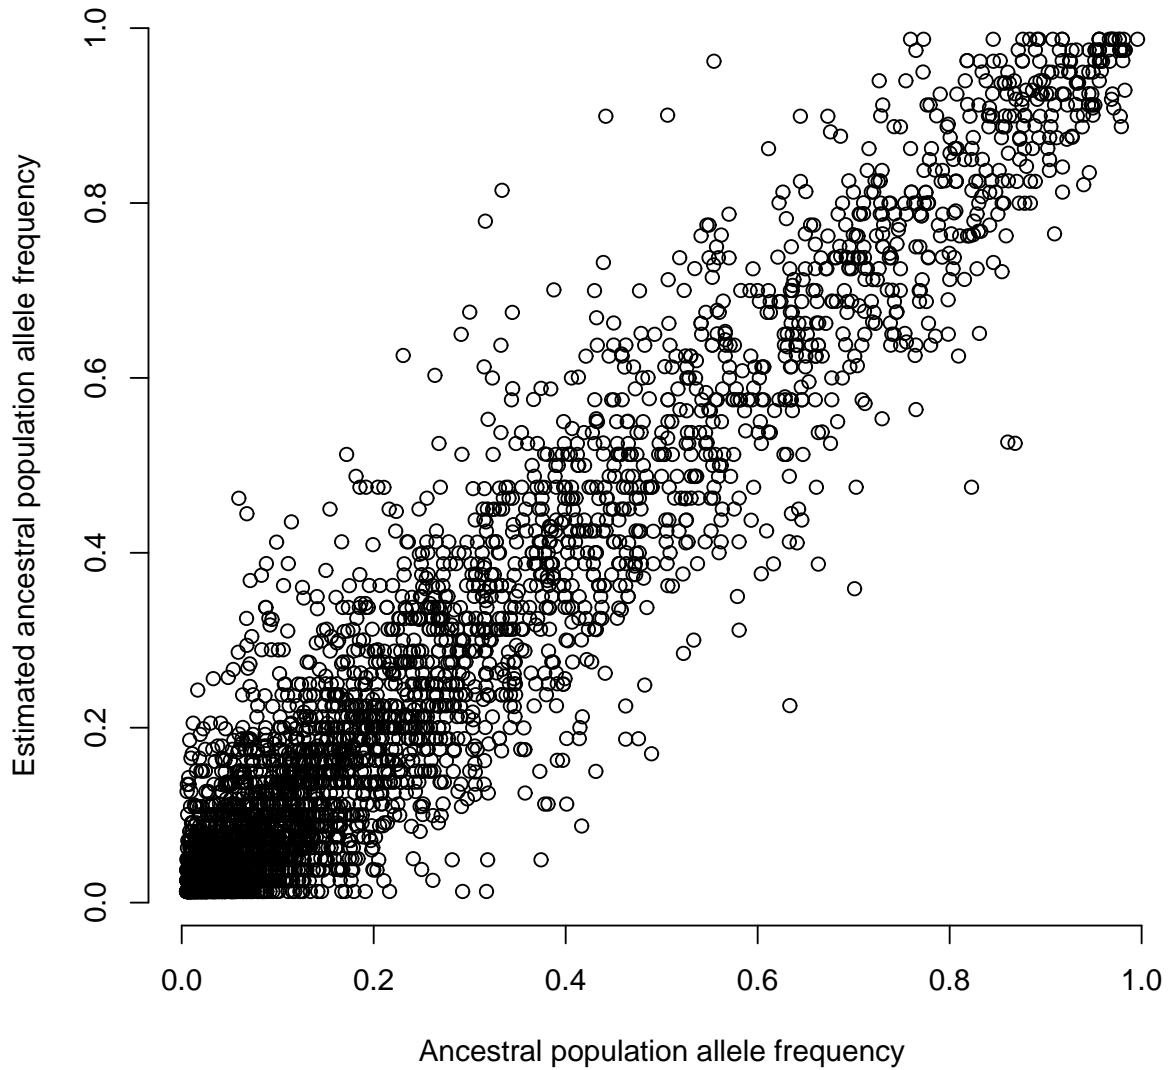

Figure S3: Ancestral population allele frequency estimated from a Maximum Likelihood procedure with unknown genotypes versus the true value used in the model. We simulated 20 individuals for each population and a total of 7,000 sites, using data from Figure 2.
