# Supplementary material
Source: PubMed Central journal article supplement (PMC3813878)
Supplement: supp_113.154740_FigureS4.pdf [file supp_113.154740_FigureS4.pdf]

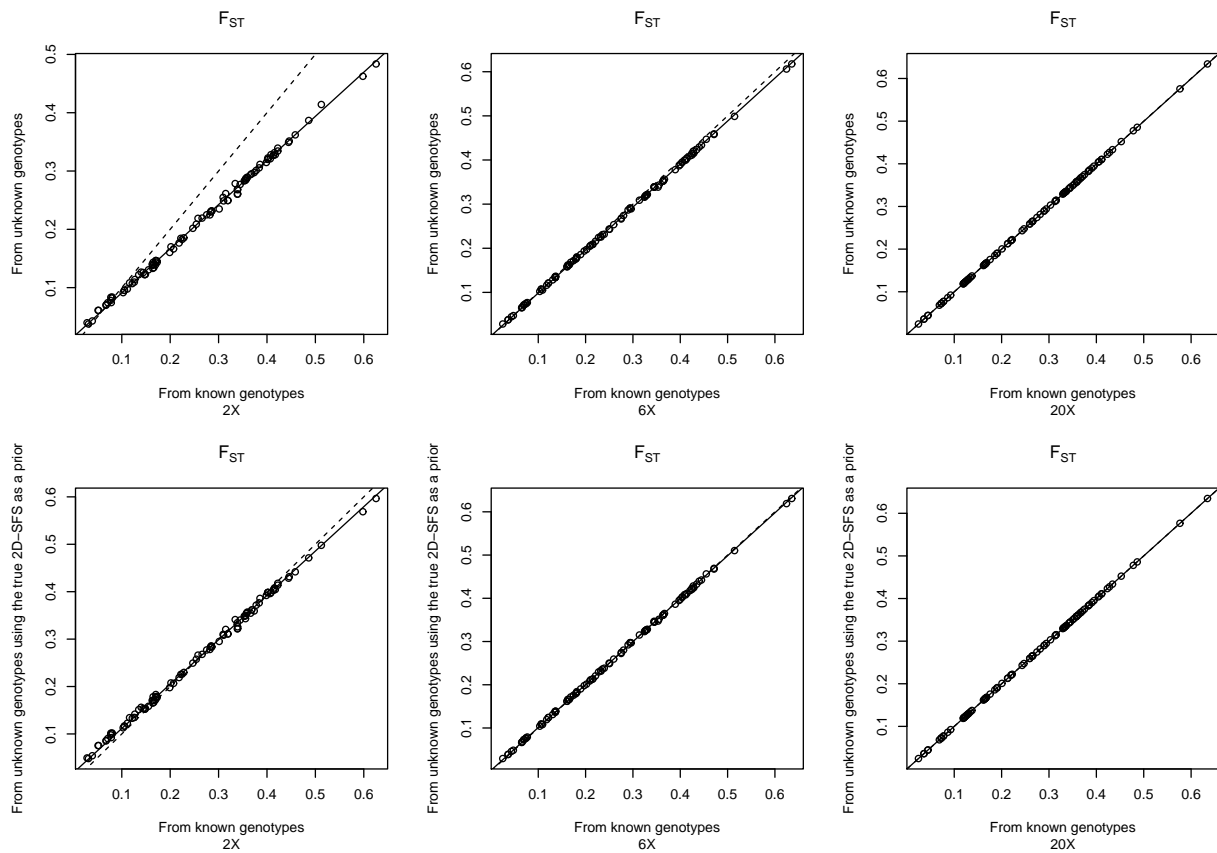

Figure S4:  $F_{ST}$  for 100 10kb regions where only 10% of the sites are variable in the population.  $F_{ST}$  is computed using the estimated global 2D-SFS (first row) or the true 2D-SFS as a prior (second row) (see Material and Methods). Dotted line represents the diagonal while the continuous line is the regressed line between true and estimated  $F_{ST}$ . We simulated a total of 1M sites at 2X, 6X and 20X sequencing coverage and 20 individuals for each population.
