# Supplementary material
Source: PubMed Central journal article supplement (PMC3813878)
Supplement: supp_113.154740_FigureS7.pdf [file supp_113.154740_FigureS7.pdf]

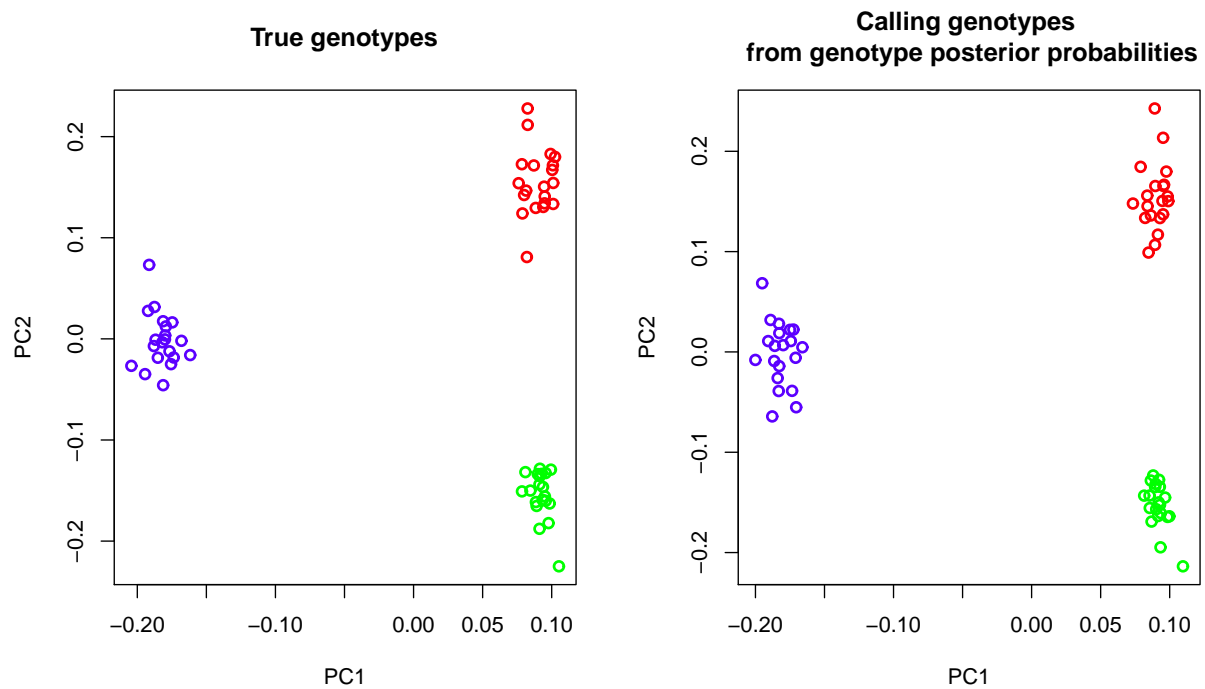

Figure S7: PCA plots from known genotypes and from called genotypes using genotype posterior probabilities. We simulated 3 populations of 20 individuals each at 20X sequencing coverage. Colors are coded according to each simulated population. Blue and green/red populations are differentiated by an  $F_{ST}$  of 0.4 while green and red populations are differentiated by an  $F_{ST}$  of 0.15. We simulated 10,000 sites, all variable in the population.
