# Supplementary material
Source: PubMed Central journal article supplement (PMC3813878)
Supplement: supp_113.154740_FigureS12.pdf [file supp_113.154740_FigureS12.pdf]

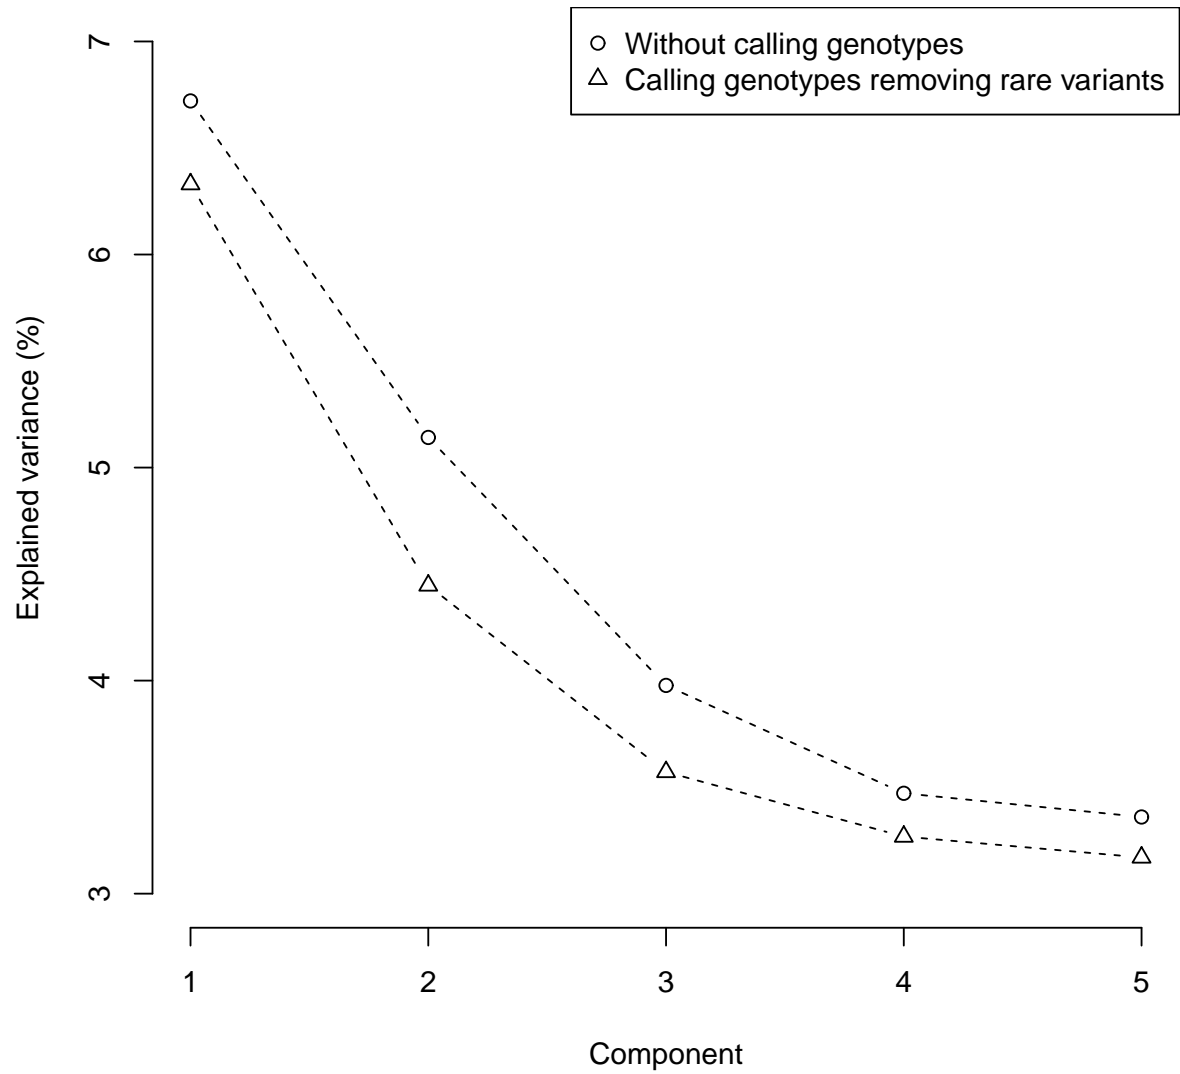

Figure S12: Percentage of explained variance from first components of PCA for wild and domesticated samples from called genotypes or without calling genotypes.
