# Supplementary material
Source: PubMed Central journal article supplement (PMC3813878)
Supplement: supp_113.154740_TableS1.pdf [file supp_113.154740_TableS1.pdf]

---

## Supporting Tables

Table S1: **Genotype calling errors.** Genotype calling errors (in %) for different scenarios of sequencing depth and different genotype calling procedures. *GC1* and *GC2* assign a heterozygous state if at least 1 or 2 alternate alleles are observed, respectively. *GC3* and *GC* assign genotypes according to the maximum genotype likelihood or genotype posterior probability, respectively. We retained only sites with no missing data.

| Sequencing depth | Number of valid sites | <i>GC1</i> | <i>GC2</i> | <i>GC3</i> | <i>GC</i> |
|------------------|-----------------------|------------|------------|------------|-----------|
| 2X               | 2,148                 | 2.53       | 1.72       | 2.53       | 1.77      |
| 6X               | 633,751               | 4.45       | 0.63       | 3.27       | 0.47      |
| 20X              | 700,007               | 13.36      | 0.47       | 0.074      | 0.0076    |
