# Supplementary material
Source: PubMed Central journal article supplement (PMC3813878)
Supplement: supp_113.154740_TableS2.pdf [file supp_113.154740_TableS2.pdf]

---

Table S2: **SNP calling false positive rates.** SNP calling false positive rates (in %) for different scenarios of sequencing depth and different genotype calling procedures. *GC1* and *GC2* assign a heterozygous state if at least 1 or 2 alternate alleles are observed, respectively. *GC3* and *GC* assign genotypes according to the maximum genotype likelihood or genotype posterior probability, respectively. We retained only sites with no missing data.

| Sequencing depth | Number of valid monomorphic sites | <i>GC1</i> | <i>GC2</i> | <i>GC3</i> | <i>GC</i> |
|------------------|-----------------------------------|------------|------------|------------|-----------|
| 2X               | 2,001                             | 43.28      | 0.15       | 43.18      | 35.78     |
| 6X               | 588,989                           | 83.28      | 1.75       | 72.48      | 11.18     |
| 20X              | 650,838                           | 99.70      | 17.55      | 2.93       | 0.22      |
