# Supplementary material
Source: PubMed Central journal article supplement (PMC3813878)
Supplement: supp_113.154740_TableS4.pdf [file supp_113.154740_TableS4.pdf]

Table S4:  $F_{ST}$  **estimators**. Names, brief descriptions, referring Equations and Figures for all different  $F_{ST}$  estimators tested in this study.

| Name                 | Description                                                                     | Equation(s) | Figure(s) |
|----------------------|---------------------------------------------------------------------------------|-------------|-----------|
| $\hat{F}_{ST.GC}$    | from called genotypes                                                           | 9           | 1-2, S1   |
| $\hat{F}_{ST.Ef2}$   | from expectation of sample allele frequency                                     | 28-31       | S2        |
| $\hat{F}_{ST.Ef1}$   | from sample allele frequency<br>calculated as the maximum posterior probability | 32          | S2        |
| $\hat{F}_{ST.Ev}$    | from expectation of genetic variance components                                 | 10-12       | 1-2, S1   |
| $\hat{F}_{ST.ML.GC}$ | ML estimator from called genotypes                                              | 9           | 2         |
| $\hat{F}_{ST.ML}$    | ML estimator without calling genotypes                                          | 17          | 2         |
